## Three-year outcomes of selective incomplete versus complete revascularization in heart failure patients receiving multivessel percutaneous coronary intervention

C. Chang, M. Hsieh, D. Chen, C. Chen, I. Hsieh

Chang Gung Memorial Hospital, Linkou Medical Center, Taoyuan, Taiwan

**Funding Acknowledgement:** Type of funding source: Foundation. Main funding source(s): Chang Gung Medical Research Program

**Background:** Heart failure (HF) patients with multi-vessel disease (MVD) are often associated with comorbidities to limit the possibility to achieve complete revascularization (CR) in percutaneous coronary intervention (PCI). The planned selective incomplete revascularization (SIR) may be an alternative opinion for these patients.

**Purpose:** To investigate 3-year clinical outcomes of SIR versus CR in HF patients with MVD in a real-world registry.

**Methods:** A total of 566 HF patients with MVD receiving either SIR or CR were enrolled. SIR was planned pre-PCI based on clinical exams to avoid non-viable tissue revascularization. Major adverse cardiac events (MACEs)

was a composite of in-hospital death, recurrent myocardial infarction, any revascularization, and all-cause death at 3-year follow-up.

**Results:** There was no significant differences between SIR and CR groups in in-hospital death, any revascularization, all-cause death and MACEs (24.3% vs. 24.9%,  $p=0.922$ ). However, SIR had a significant lower incidence of recurrent myocardial infarction than CR (3.2% vs. 7.2%,  $p=0.032$ ).

**Conclusion:** The 3-year outcomes of PCI with planned SIR were completely comparable to with CR in HF patients with MVD. Planned SIR can be an opinion for HF patients with MVD who are not suitable to achieve CR.

Baseline characteristics

|                                 | SIR (n=317) | CR (n=249) | P-value |
|---------------------------------|-------------|------------|---------|
| Age, years old                  | 64.4±11.9   | 64.4±11.7  | 0.963   |
| Female gender, n (%)            | 62 (19.6)   | 40 (16.1)  | 0.322   |
| Hypertension, n (%)             | 187 (59.0)  | 135 (54.2) | 0.267   |
| Diabetes mellitus, n (%)        | 156 (49.2)  | 107 (43.0) | 0.149   |
| Hyperlipidemia, n (%)           | 149 (47.0)  | 104 (41.8) | 0.233   |
| Smoking, n (%)                  | 129 (40.7)  | 108 (43.4) | 0.548   |
| Previous history of MI, n (%)   | 254 (80.1)  | 193 (77.5) | 0.468   |
| eGFR, ml/min/1.73m <sup>2</sup> | 67.4±62.2   | 71.5±29.6  | 0.358   |
| LVEF, %                         | 35.4±7.6    | 35.1±7.5   | 0.666   |
| LVEDV, ml                       | 166.4±50.5  | 167.6±44.7 | 0.766   |
| Calcified lesion stentin, n (%) | 81 (25.6)   | 67 (26.9)  | 0.773   |
| Drug-eluting stenting, n (%)    | 166 (52.4)  | 138 (55.4) | 0.497   |
| Survival to discharge number, n | 307         | 238        |         |
| ACEi or ARB, n (%)              | 248 (80.8)  | 191 (80.3) | 0.913   |
| Beta blocker, n (%)             | 279 (90.9)  | 215 (90.3) | 0.883   |
| MRA, n (%)                      | 62 (20.2)   | 46 (19.3)  | 0.829   |

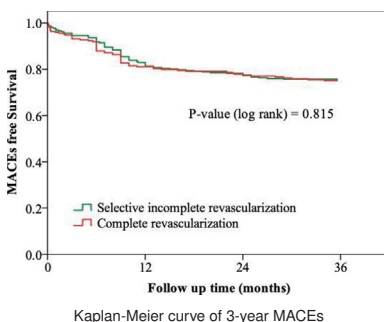

Source: http://academic.oup.com/eurheartj/article-pdf/41/Supplement_2/ehaa946.1131/34522286/ehaa946.1131.pdf
